# Supplementary material
Source: PubMed Central journal article supplement (PMC4023960)

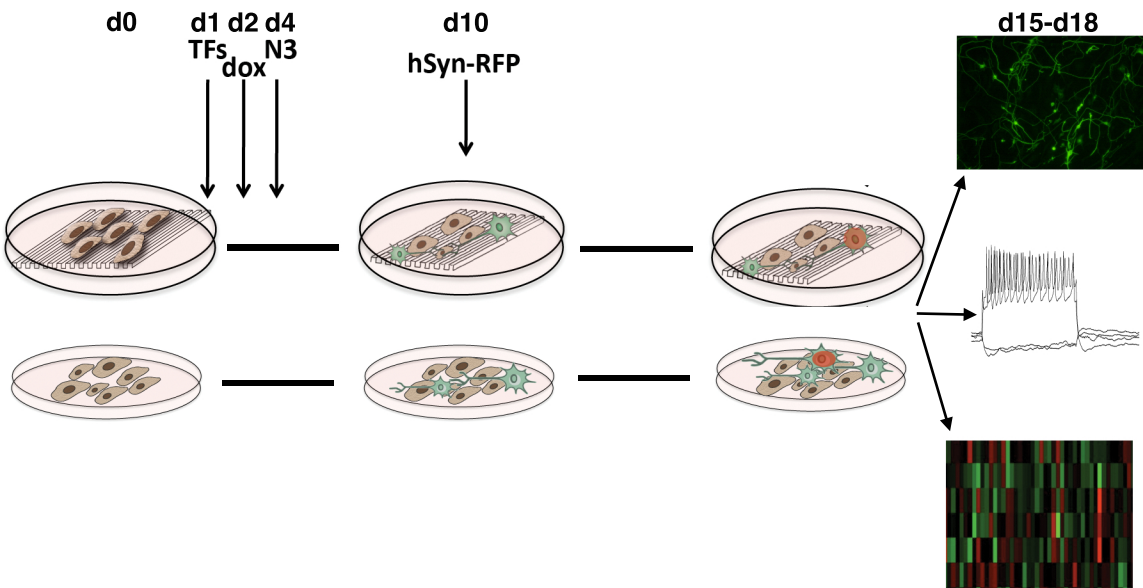

Supplement: NIHMS579138-supplement-01.pdf [file NIHMS579138-supplement-01.pdf]

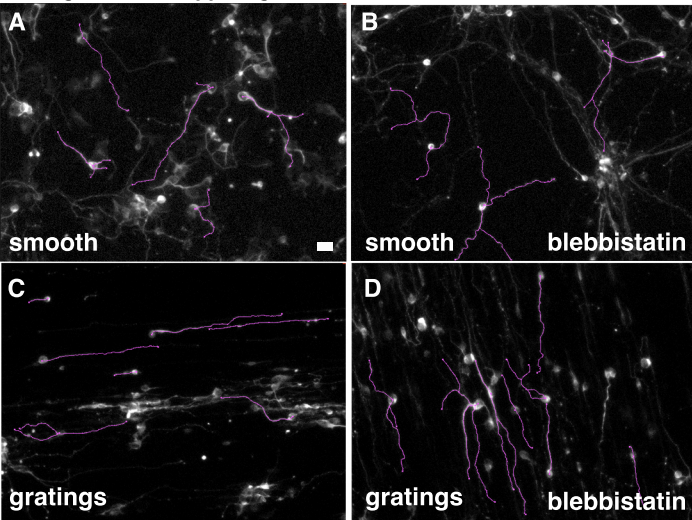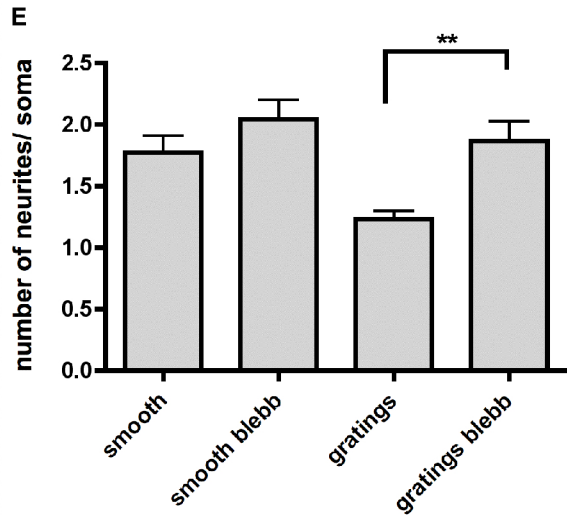

Supplement: NIHMS579138-supplement-02.pdf [file NIHMS579138-supplement-02.pdf]
